# Supplementary material
Source: PubMed Central journal article supplement (PMC9398954)

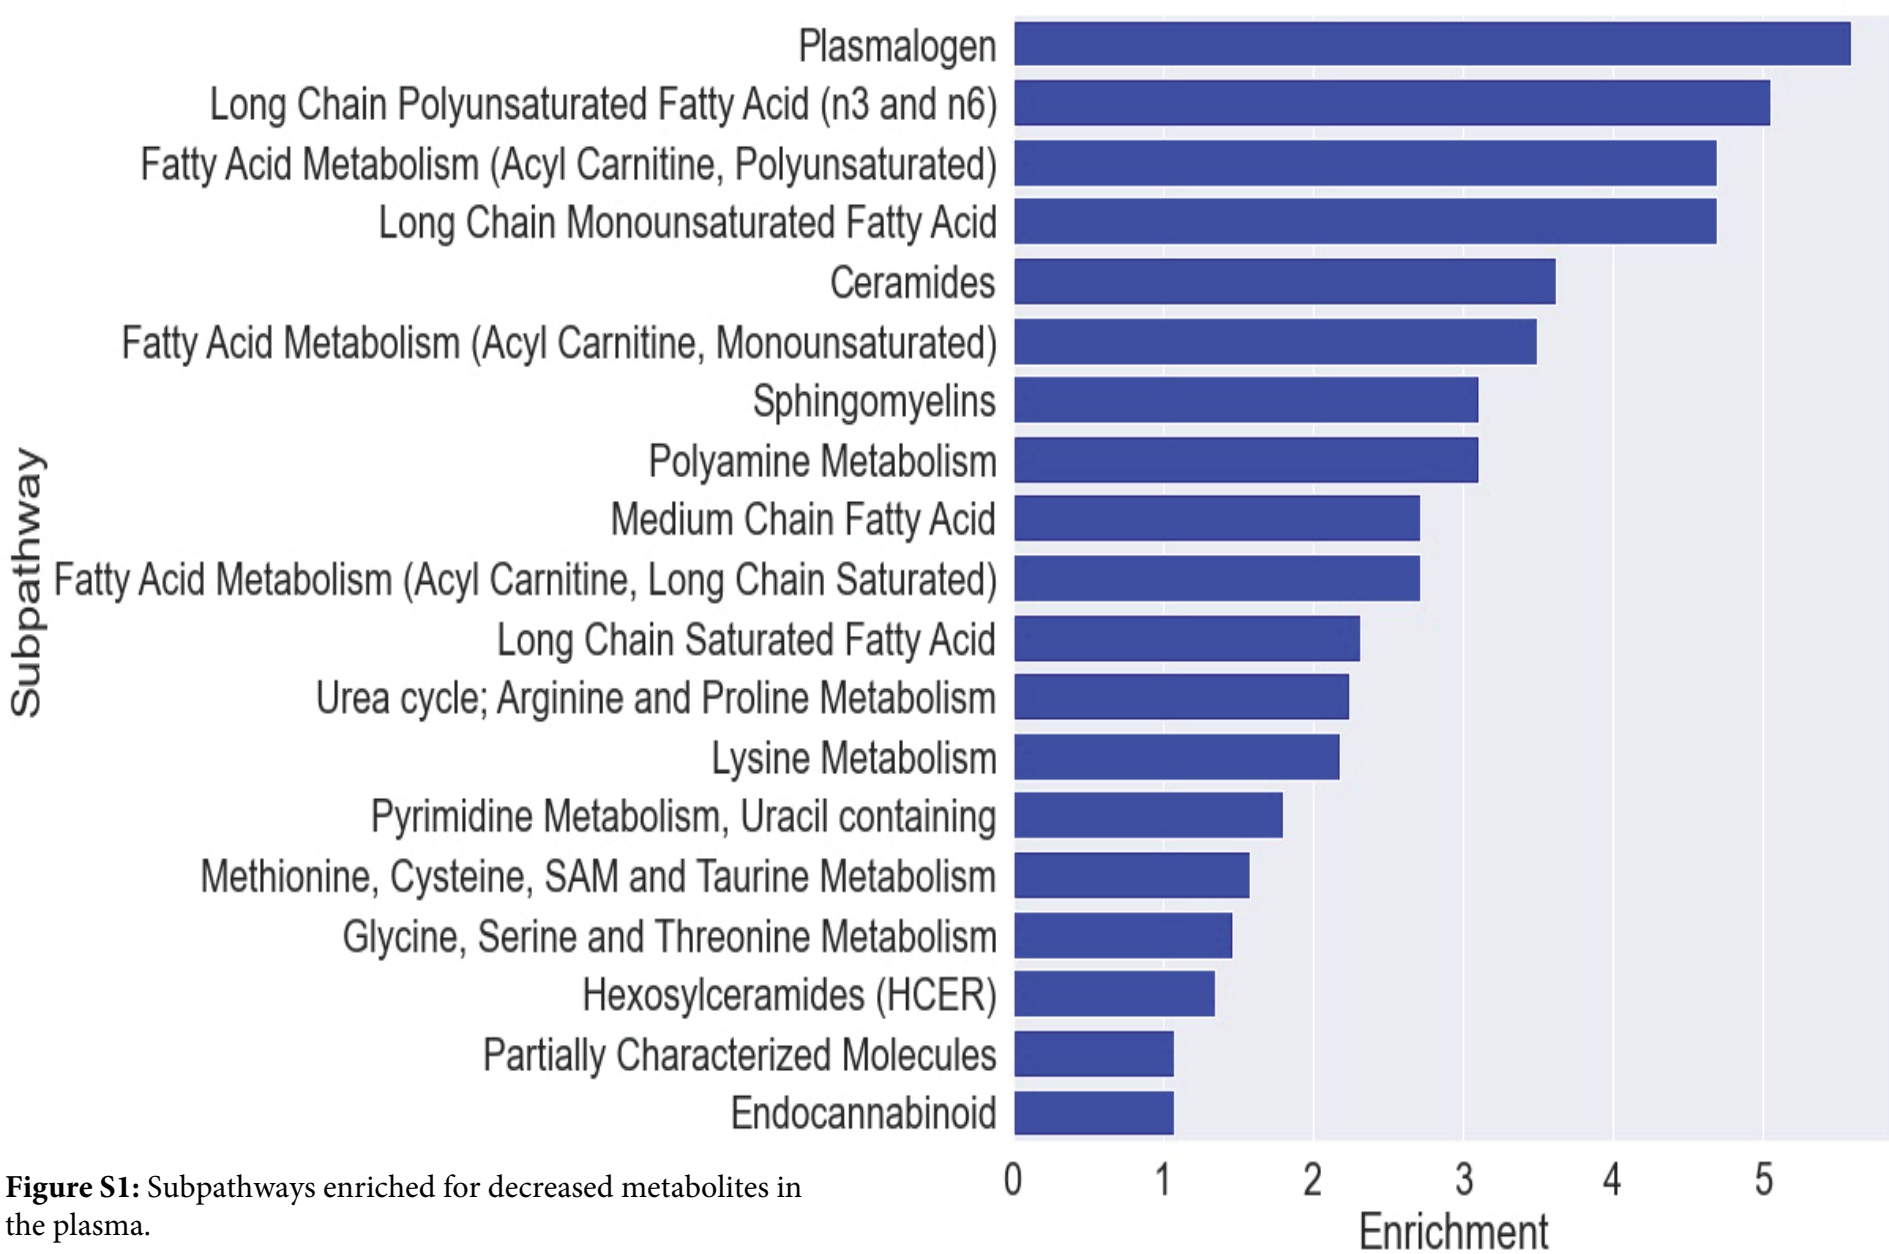

**Figure S1:** Subpathways enriched for decreased metabolites in the plasma.

Supplement: NIHMS1802920-supplement-fS1.pdf [file NIHMS1802920-supplement-fS1.pdf]

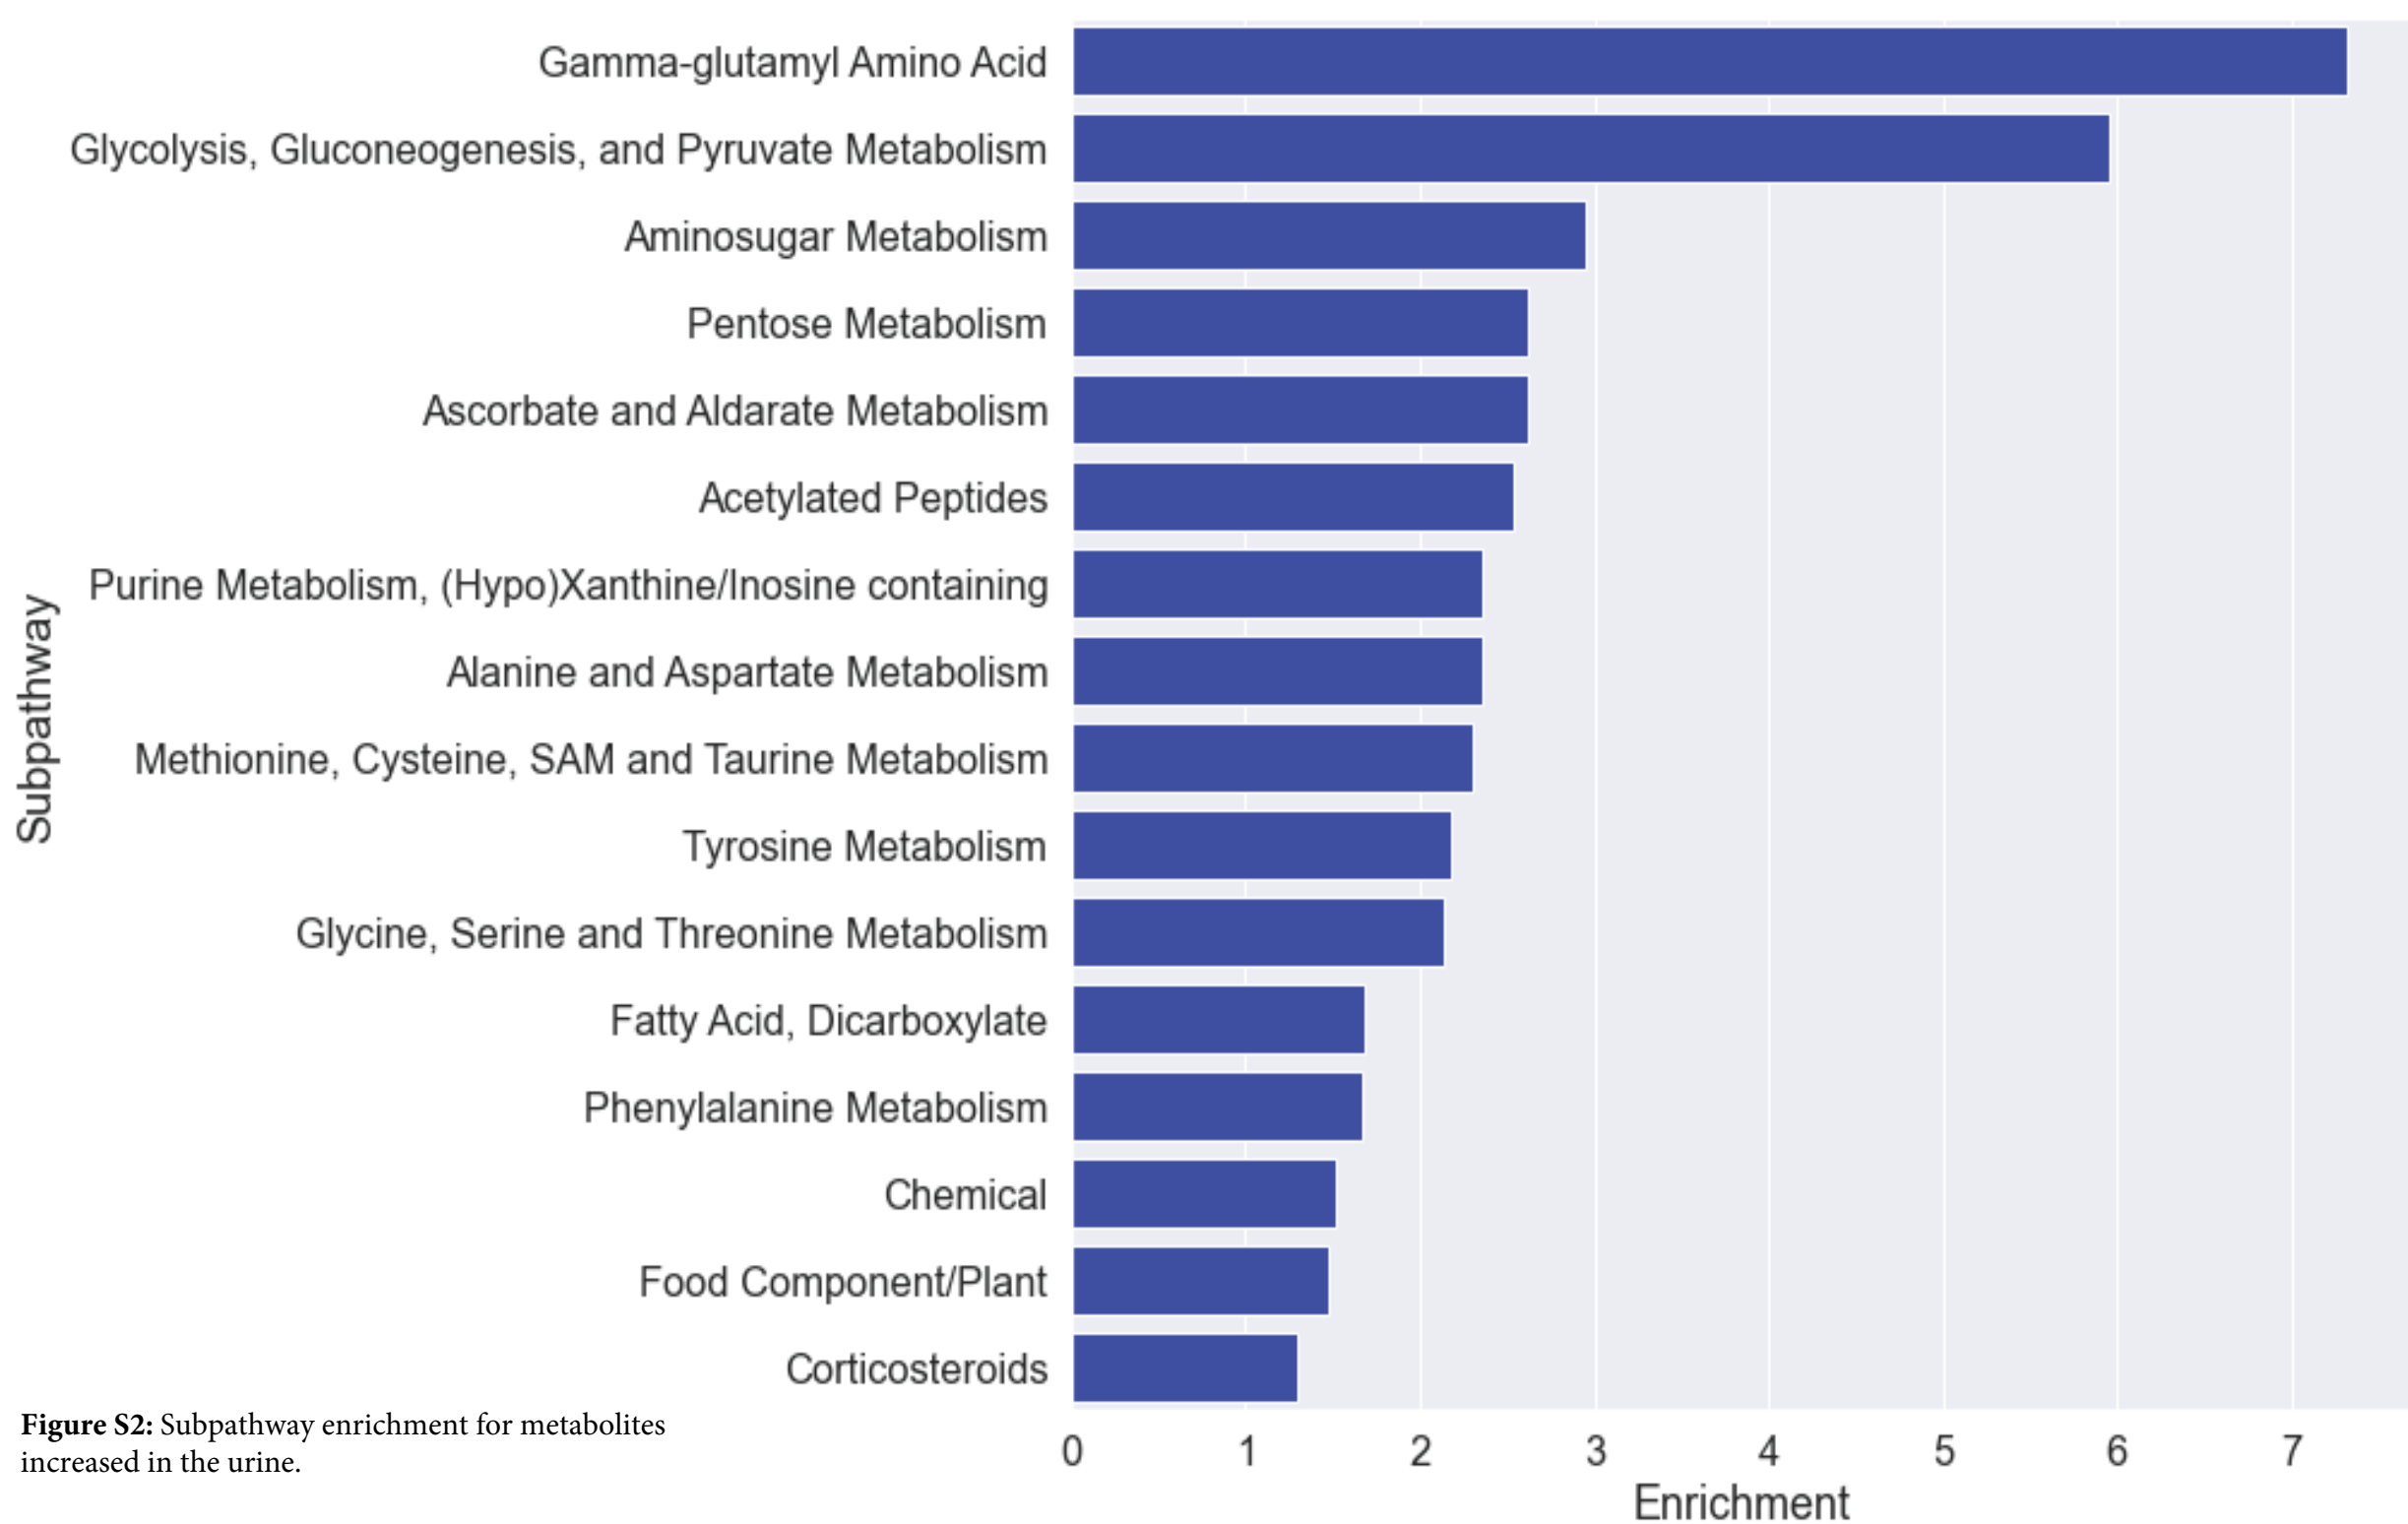

**Figure S2:** Subpathway enrichment for metabolites increased in the urine.

Supplement: NIHMS1802920-supplement-fS2.pdf [file NIHMS1802920-supplement-fS2.pdf]
